# Supplementary material
Source: MDPI journal article supplement (https://www.mdpi.com/1424-8247/15/6/766)

# Inhibitors of *O*-acetylserine sulfhydrylase with a cyclopropane-carboxylic acid scaffold are effective colistin adjuvants in Gram negative bacteria.

Giannamaria Annunziato<sup>a\*</sup>, Costanza Spadini<sup>b</sup>, Marialaura Marchetti<sup>c</sup>, Nina Franko<sup>d</sup>, Marialaura Pavone<sup>a</sup>, Mattia Iannarelli<sup>b</sup>, Agostino Bruno<sup>a</sup>, Marco Pieroni<sup>a</sup>, Stefano Bettati<sup>c</sup>, Clotilde Silvia Cabassi<sup>b</sup>, Barbara Campanini<sup>d</sup>, Gabriele Costantino<sup>a</sup>.

## SUPPORTING INFORMATION

### Analytical methods (HPLC-ESI-MS)

Samples were injected (10  $\mu$ L) and chromatographically separated using a reversed-phase C18 XSelect<sup>®</sup> HSS T3 column 2.1 x 50 mm, 2.5 particle size (WATERS, Ireland). A gradient profile was applied using water (eluent A) and acetonitrile (eluent B), acidified with 0.2% and 0.1 % formic acid respectively, as a mobile phase. Mass spectrometry data were collected in positive electrospray mode over the range of *m/z* 100-600. Source settings were maintained using a capillary voltage of 2.5 kV (compounds **8a** and **9a**), 3.5 kV (compound **12h**), or 4.0 kV (compound **13h**); a cone of 25 V (compounds **8a** and **9a**) or 30 (compounds **12h** and **13h**), source temperature, 120°C; desolvation temperature, 350 °C, and desolvation gas flow, 700 L/h.

**Method A:** Initial conditions were set up at 5% of B, after 2.0 min of isocratic step, a linear change to 100% of B in 8.0 min. 100% B was achieved in 10 min and held for 5 min to allow for the column washing before returning to the initial conditions. Column recondition was achieved over 5 min, proving a total run time of 20 min. The column was maintained at 30°C and a flow rate of 0.200 mL/min was used.

**Method B:** The gradient started with 100% of A, after 2.0 min of isocratic step, a linear change to 90% of B in 8.0 min. 100% B was achieved in 10 min and held for 5 min to allow for the column washing before returning to the initial conditions. Column recondition was achieved over 1 min and held for 7 min, proving a total run time of 23 min. The column was maintained at 30°C and a flow rate of 0.200 mL/min was used.

**Figure S1.**

**Ethyl 2-(3-(2-aminopyrimidin-5-yl)phenyl)-1-(4-methylbenzyl)cyclopropane-1-carboxylate (8a)**

$^1\text{H}$  NMR (400 MHz,  $\text{DMSO}-d_6$ )

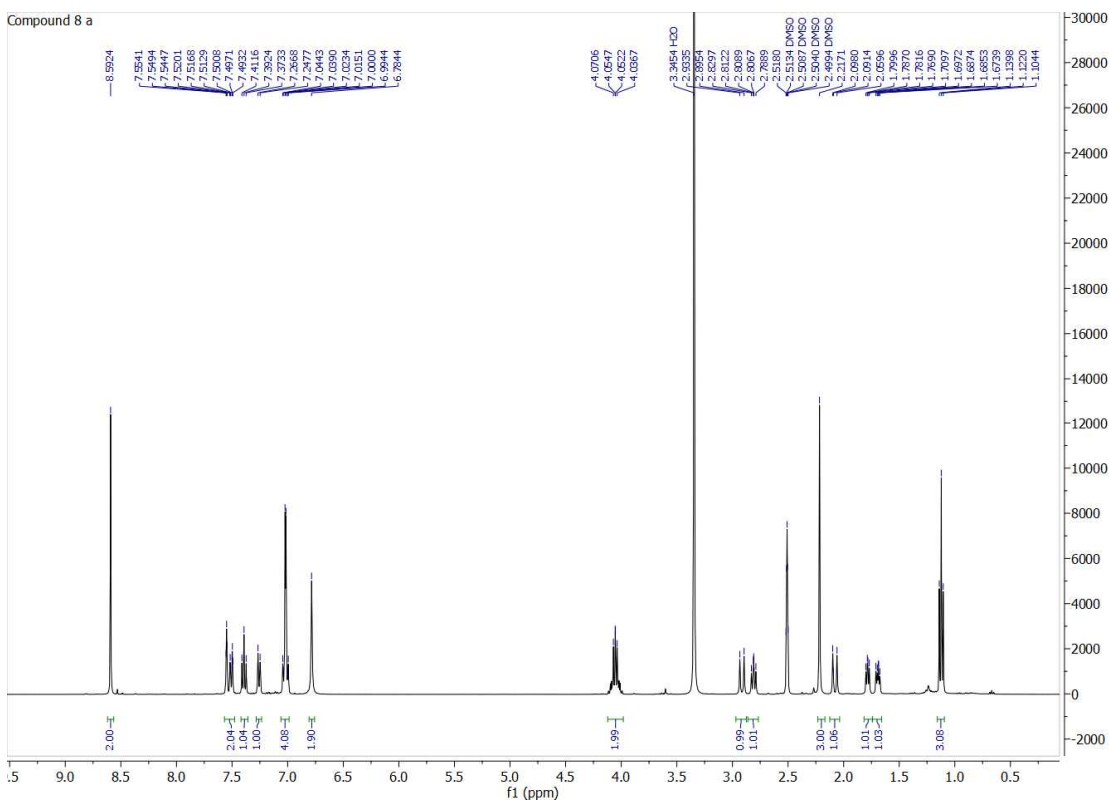

Figure S2.

**Ethyl 2-(3-(2-aminopyrimidin-5-yl)phenyl)-1-(4-methylbenzyl)cyclopropane-1-carboxylate (8a)**

$^{13}\text{C}$  NMR (100.6 MHz,  $\text{DMSO}-d_6$ )

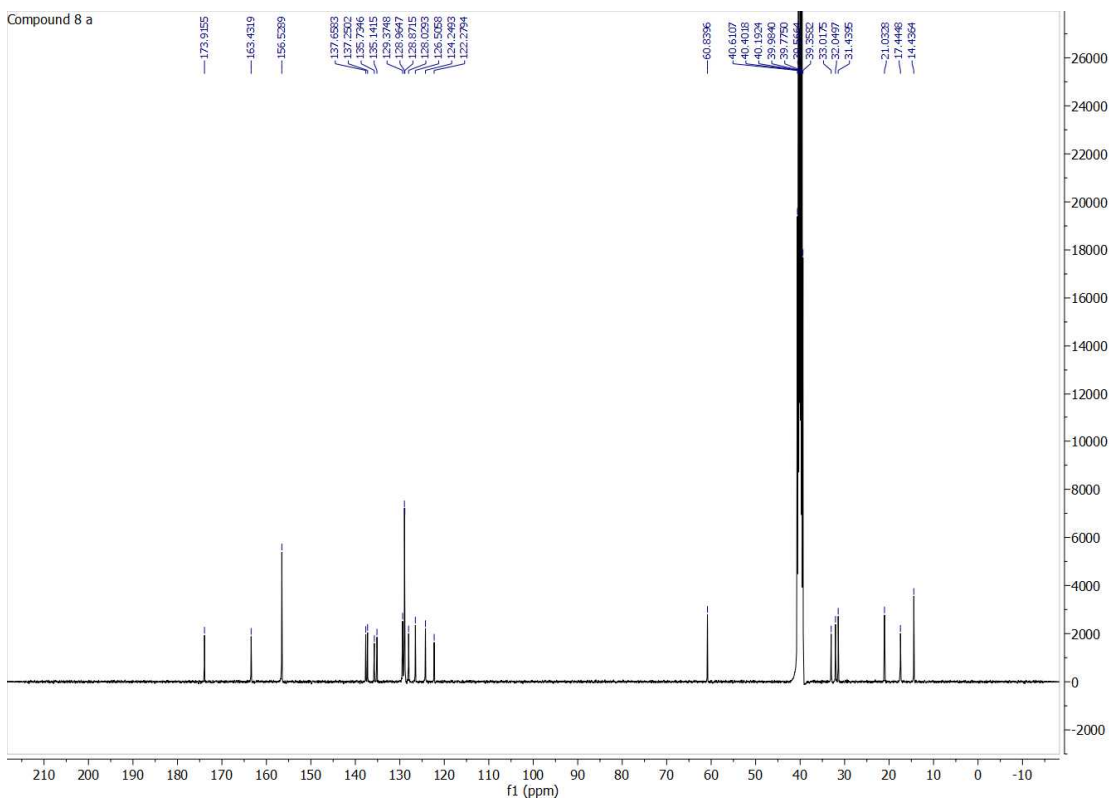

**Figure S3.**

**HPLC/MS analysis (8a)**

Method A

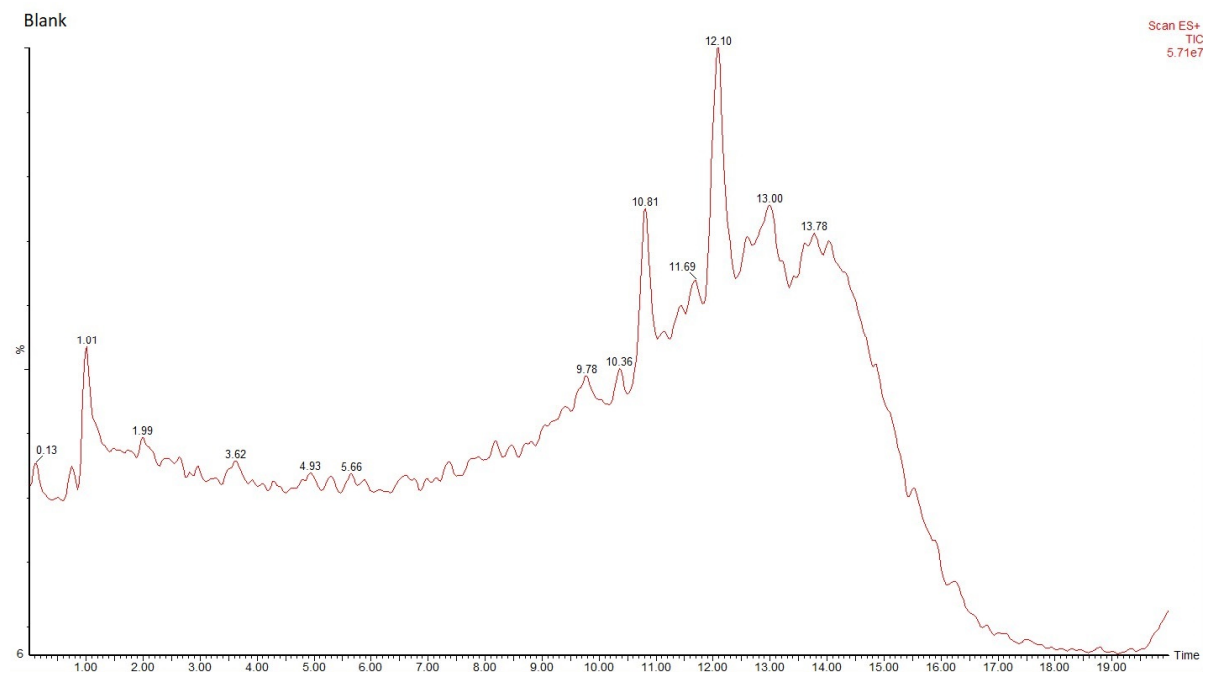

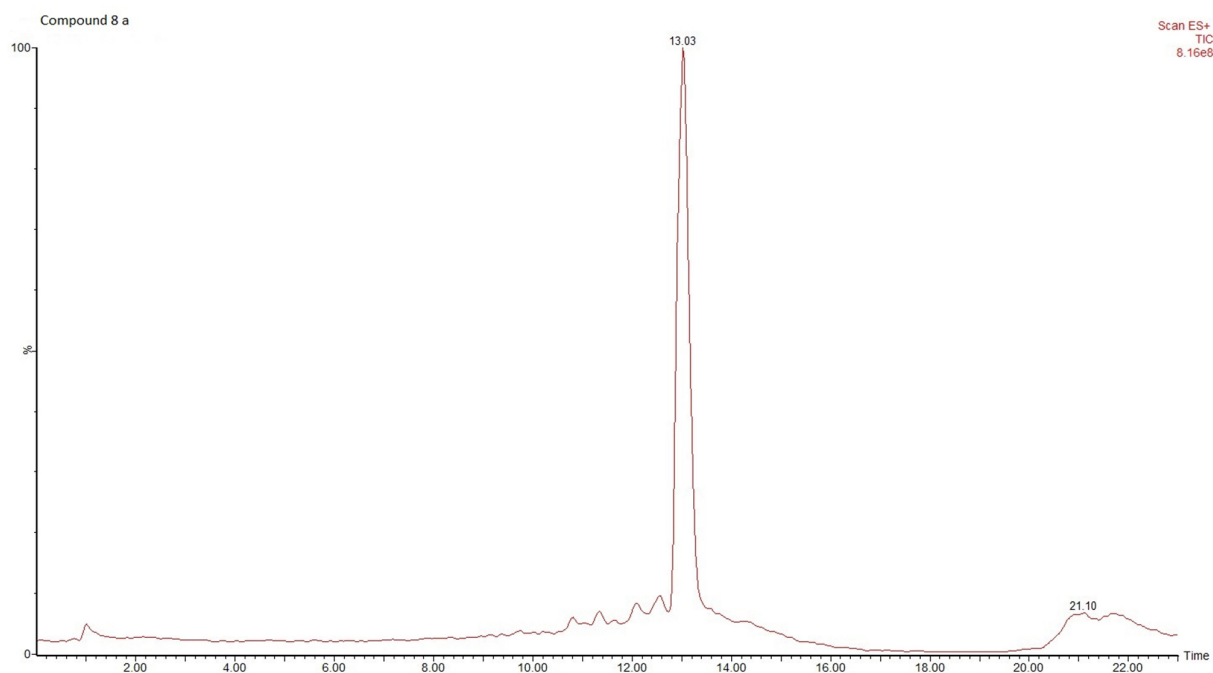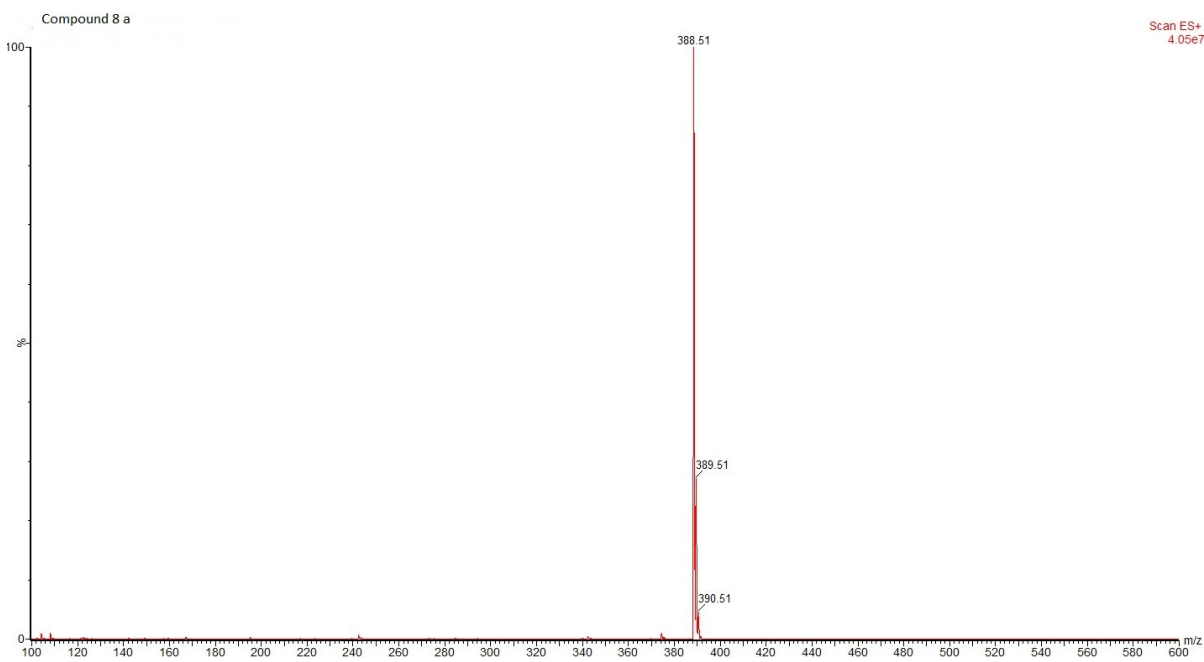

**Figure S4.**

**2-(3-(2-aminopyrimidin-5-yl)phenyl)-1-(4-methylbenzyl)cyclopropane-1-carboxylic acid (9a)**

$^1\text{H}$  NMR (400 MHz,  $\text{DMSO}-d_6$ )

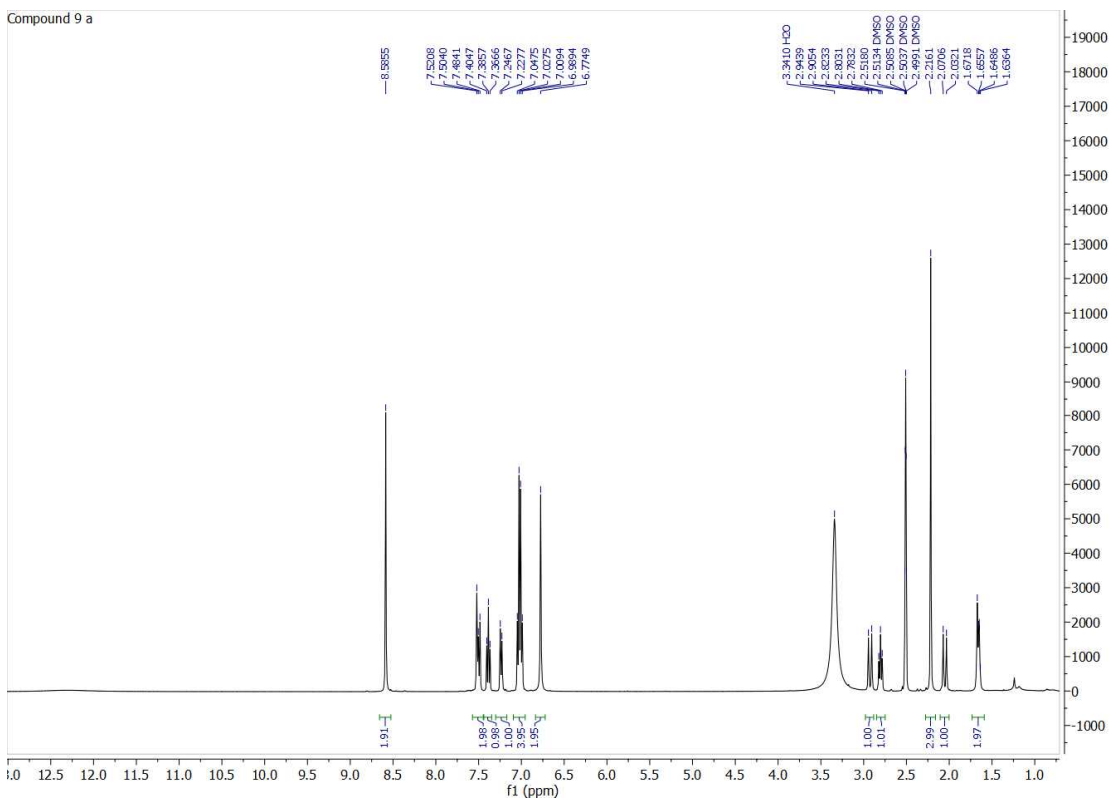

Figure S5.

**2-(3-(2-aminopyrimidin-5-yl)phenyl)-1-(4-methylbenzyl)cyclopropane-1-carboxylic acid (9a)**

$^{13}\text{C}$  NMR (100.6 MHz,  $\text{DMSO}-d_6$ )

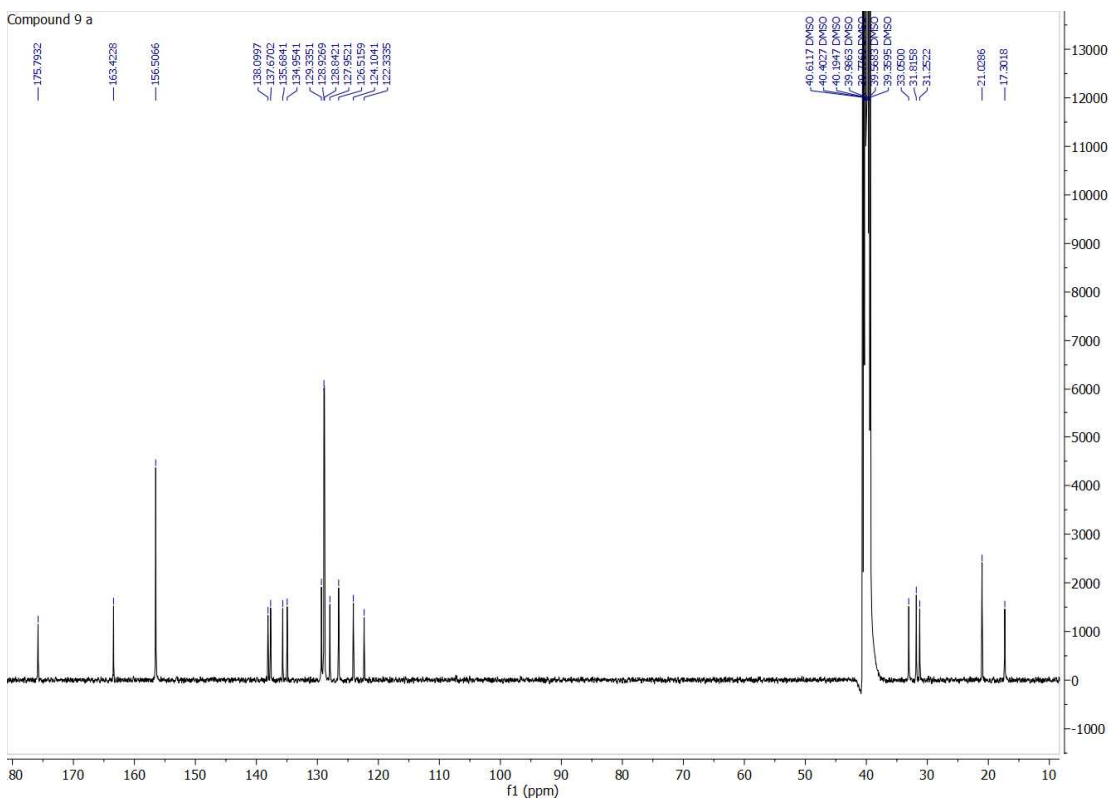

**Figure S6.**

**HPLC/MS analysis (9a)**

Method A

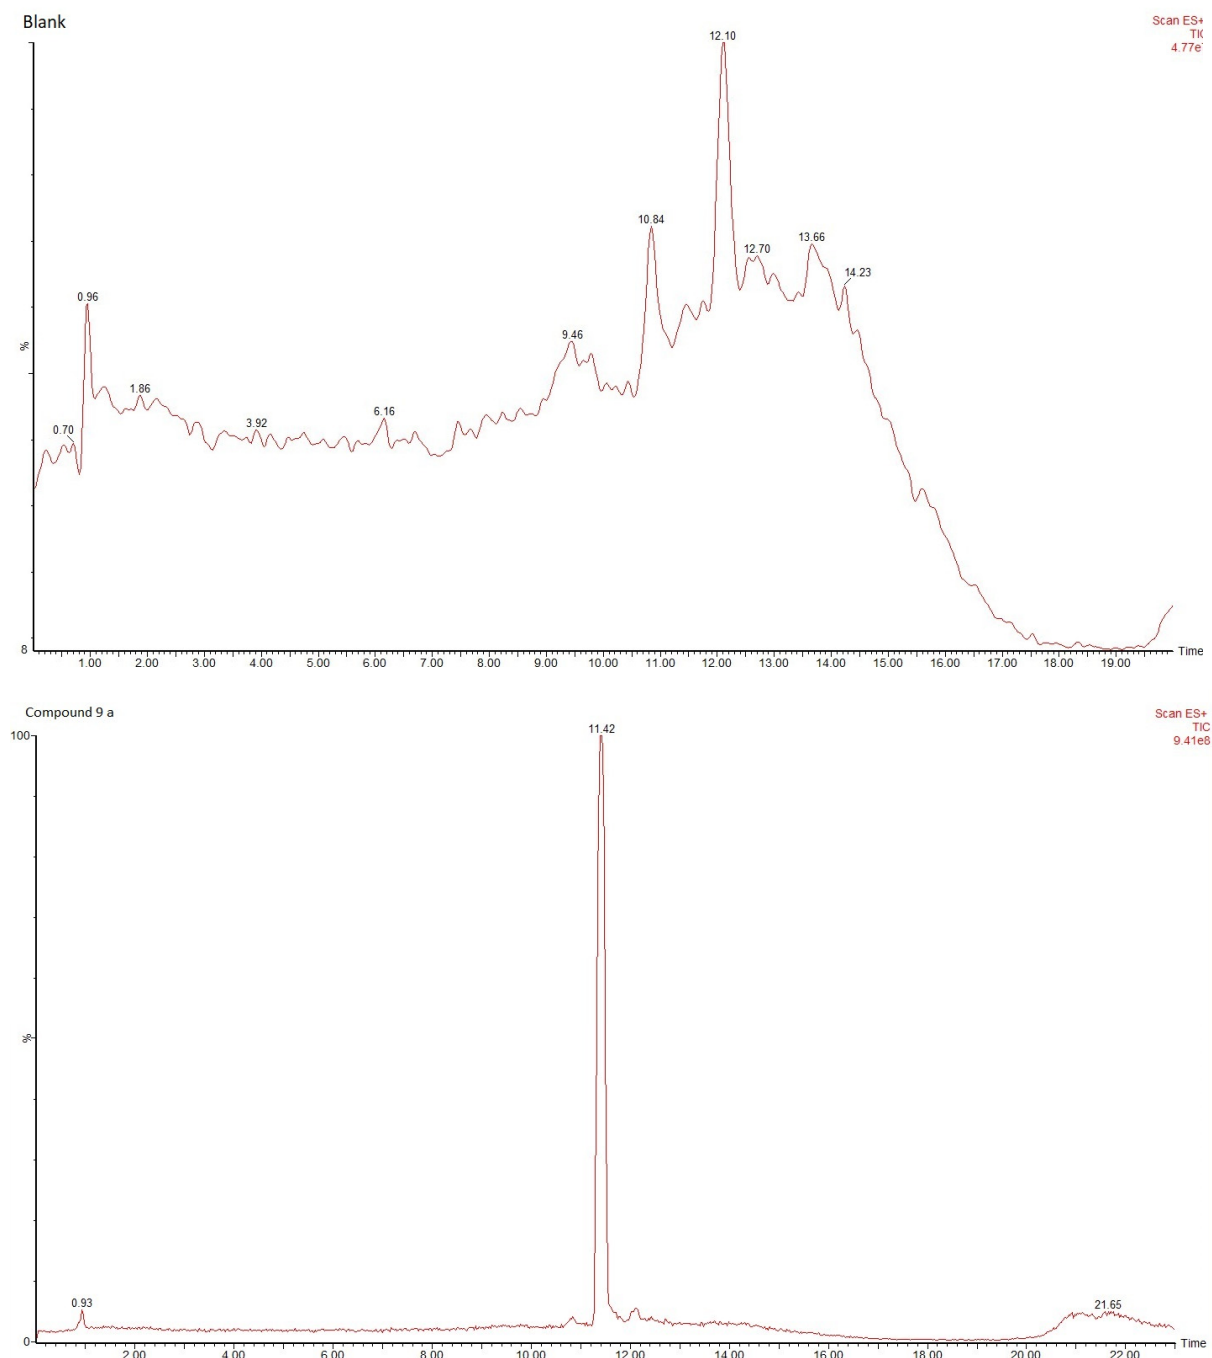



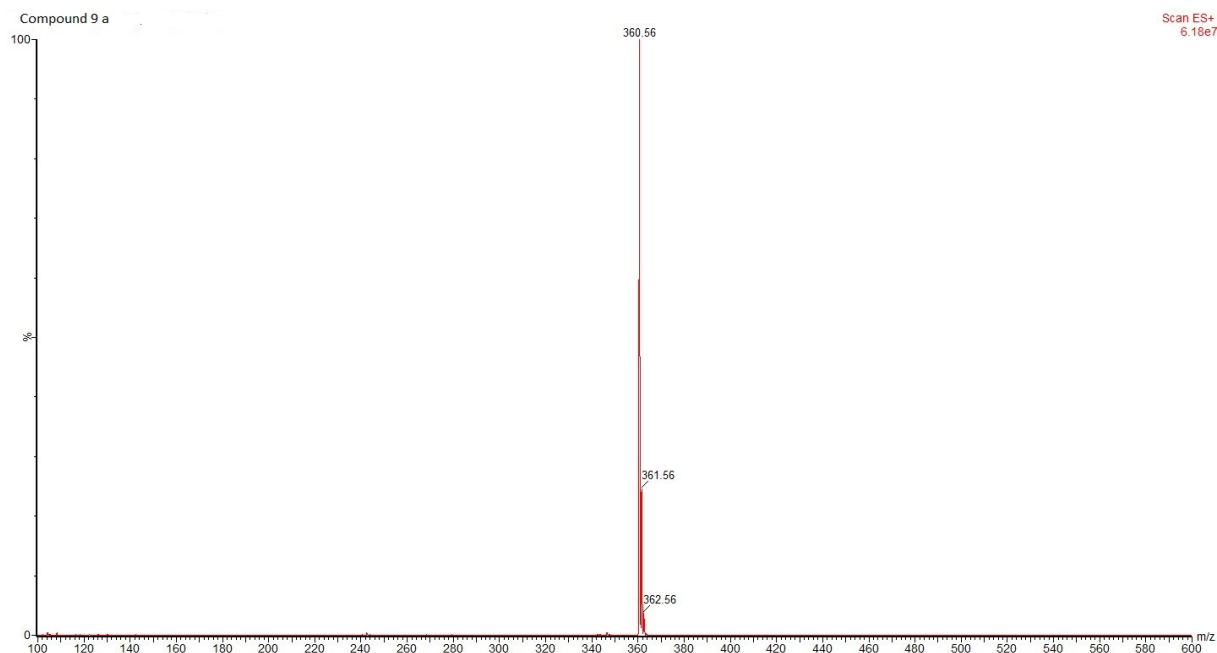

Figure S7.

**Ethyl 2-(3-(2,6-dimethylmorpholino)phenyl)-1-(4-methylbenzyl)cyclopropane-1-carboxylate (12h)**

$^1\text{H}$  NMR (400 MHz,  $\text{CDCl}_3$ )

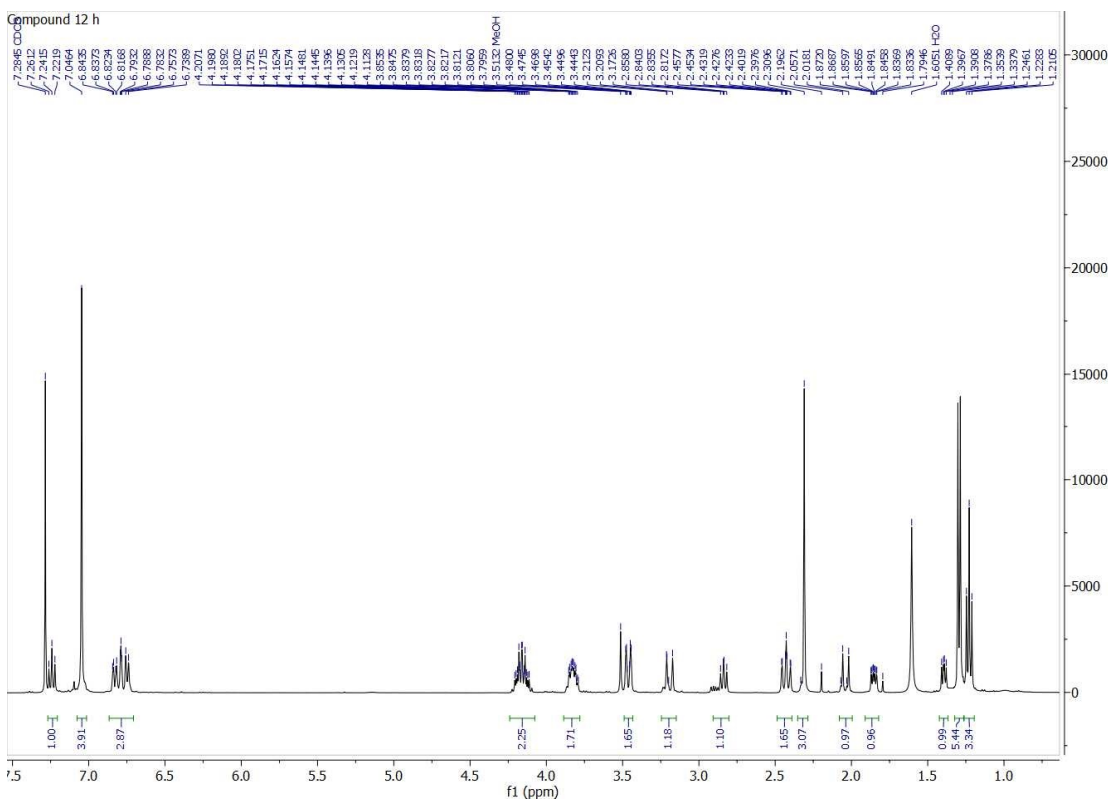

Figure S8.

**Ethyl 2-(3-(2,6-dimethylmorpholino)phenyl)-1-(4-methylbenzyl)cyclopropane-1-carboxylate (12h)**

$^{13}\text{C}$  NMR (400 MHz,  $\text{CDCl}_3$ )

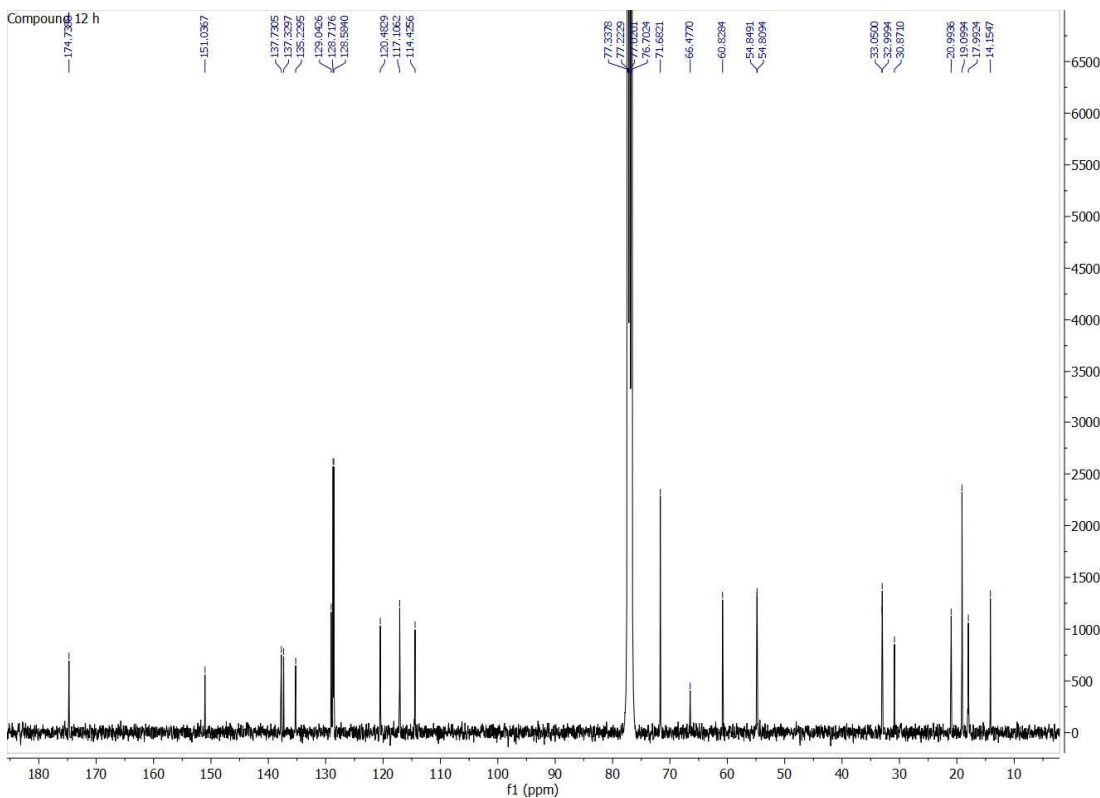

**Figure S9.**

**HPLC/MS analysis (12h)**

**Method B**

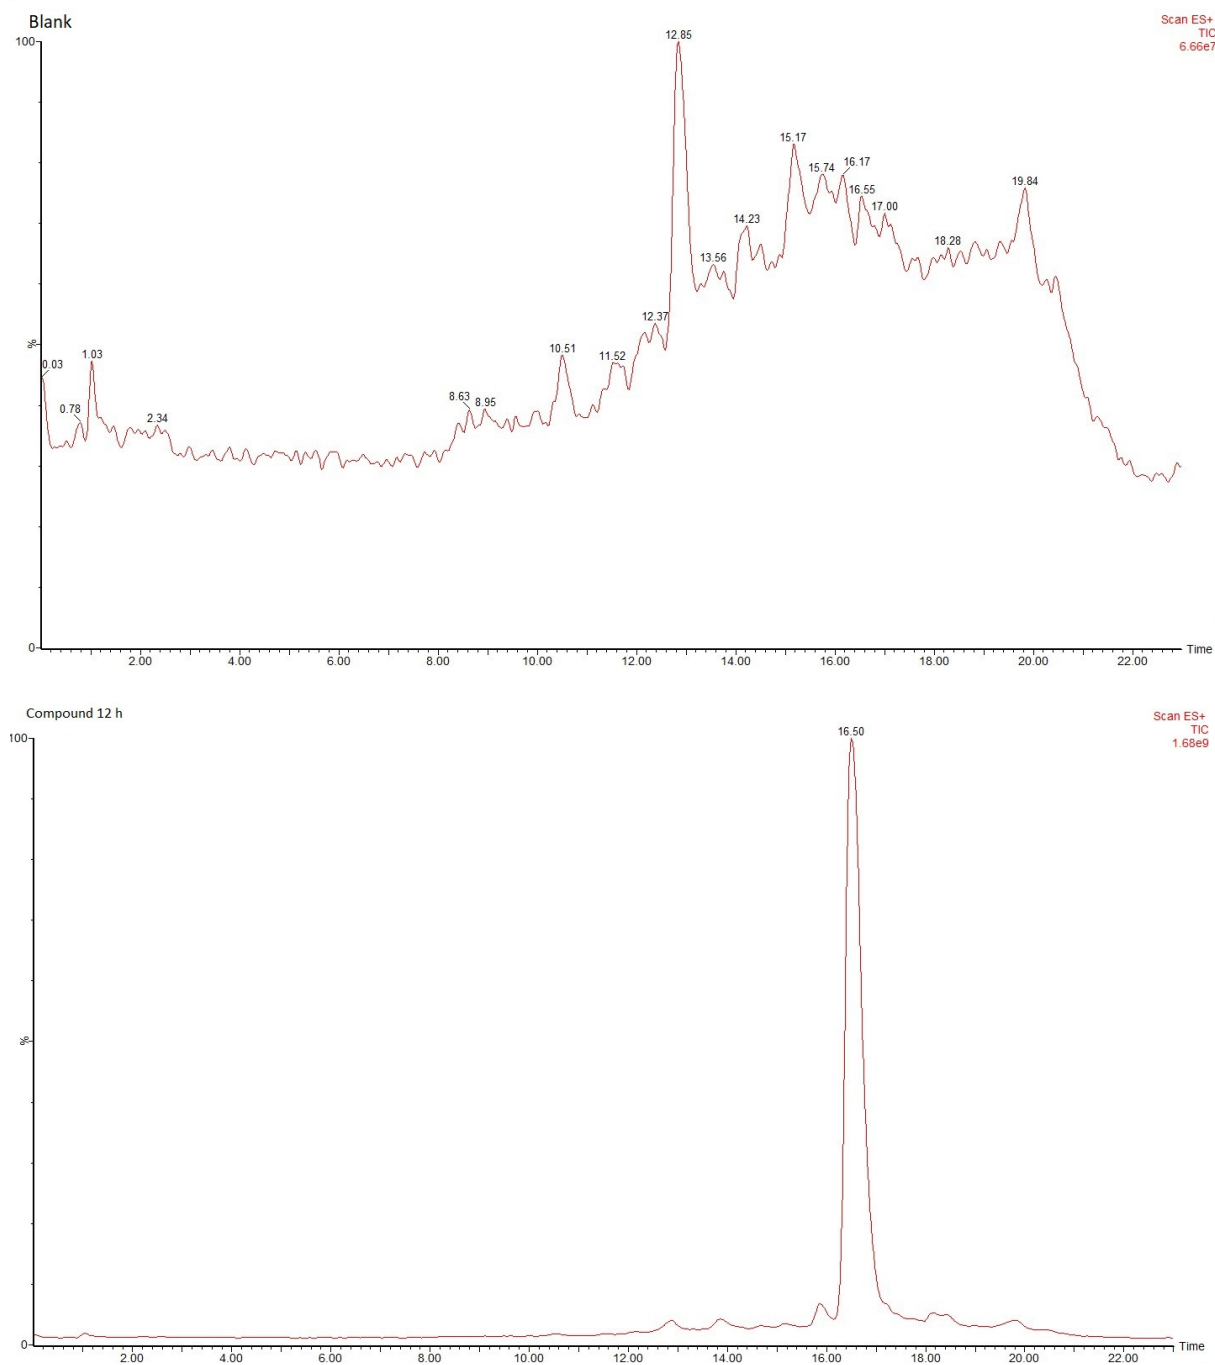

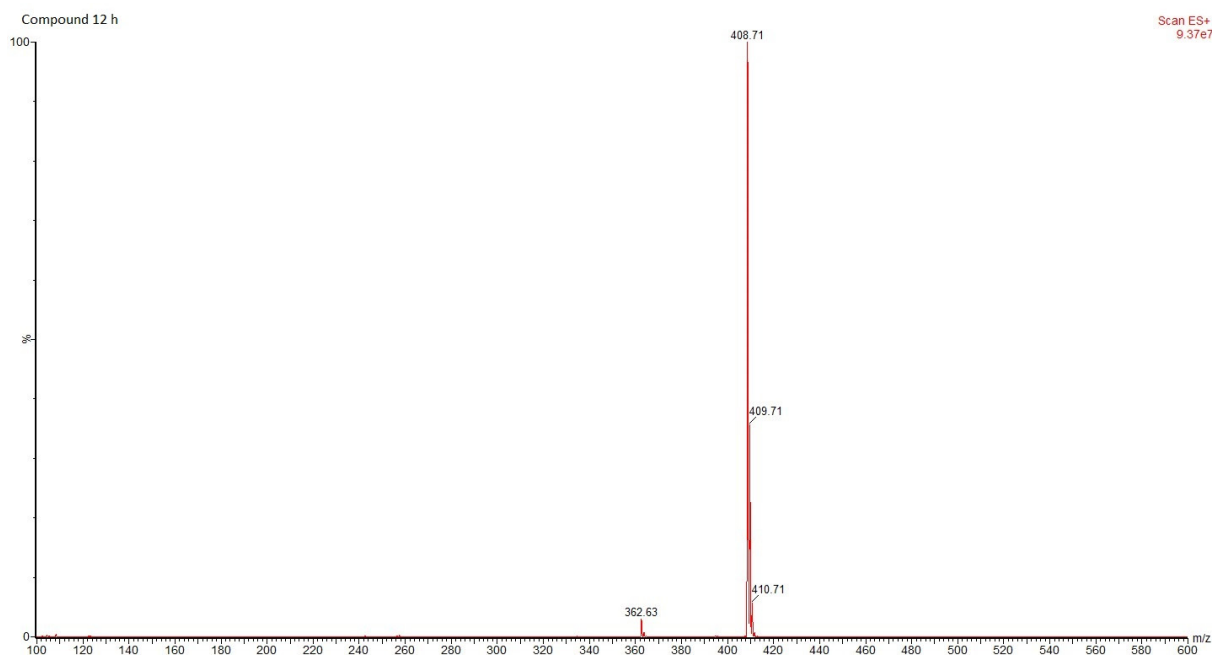

Figure S10.

**2-(3-(2,6-dimethylmorpholino)phenyl)-1-(4-methylbenzyl)cyclopropane-1-carboxylic acid (13 h)**

$^1\text{H}$  NMR (400 MHz,  $\text{DMSO}-d_6$ )

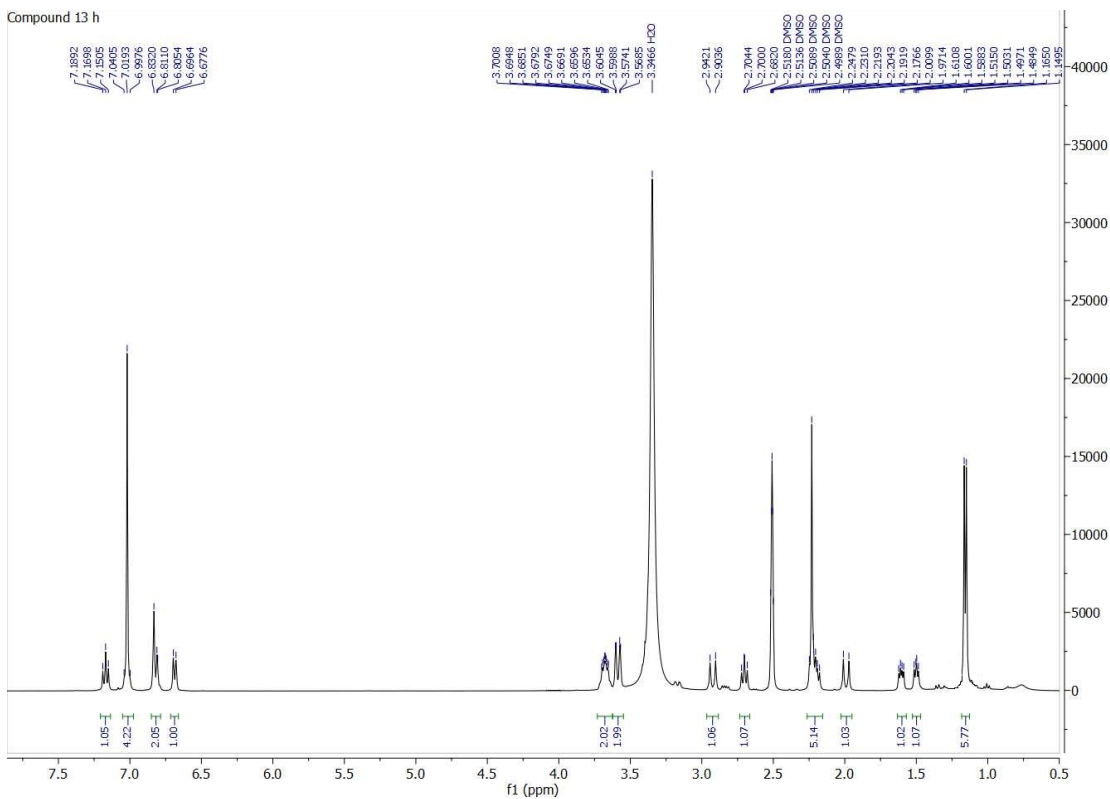

Figure S11.

**2-(3-(2,6-dimethylmorpholino)phenyl)-1-(4-methylbenzyl)cyclopropane-1-carboxylic acid (13 h)**

$^{13}\text{C}$  NMR (100.6 MHz,  $\text{DMSO}-d_6$ )

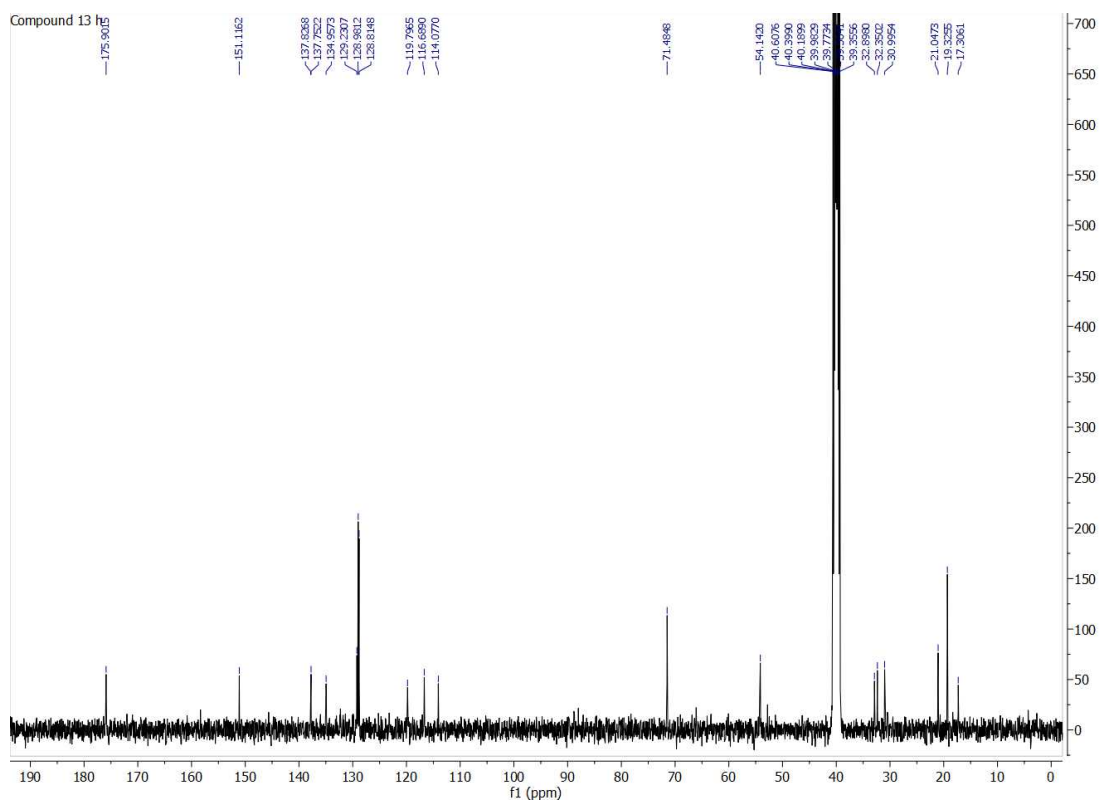

**Figure S12.**

**HPLC/MS analysis (13h)**

**Method B**

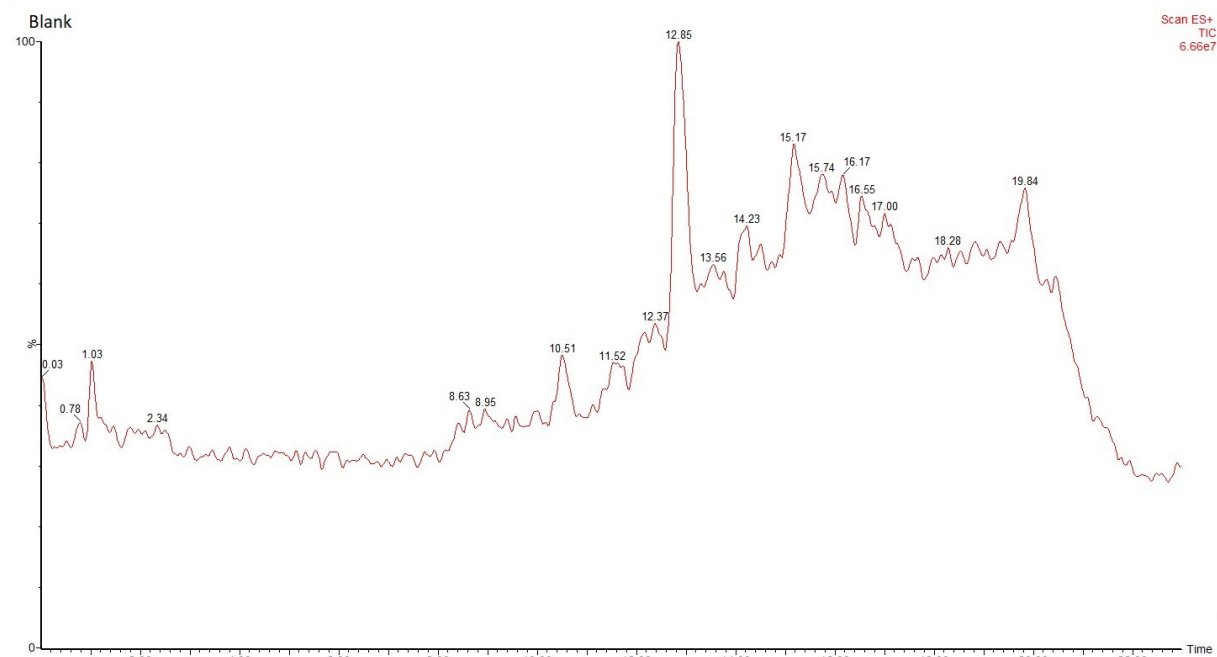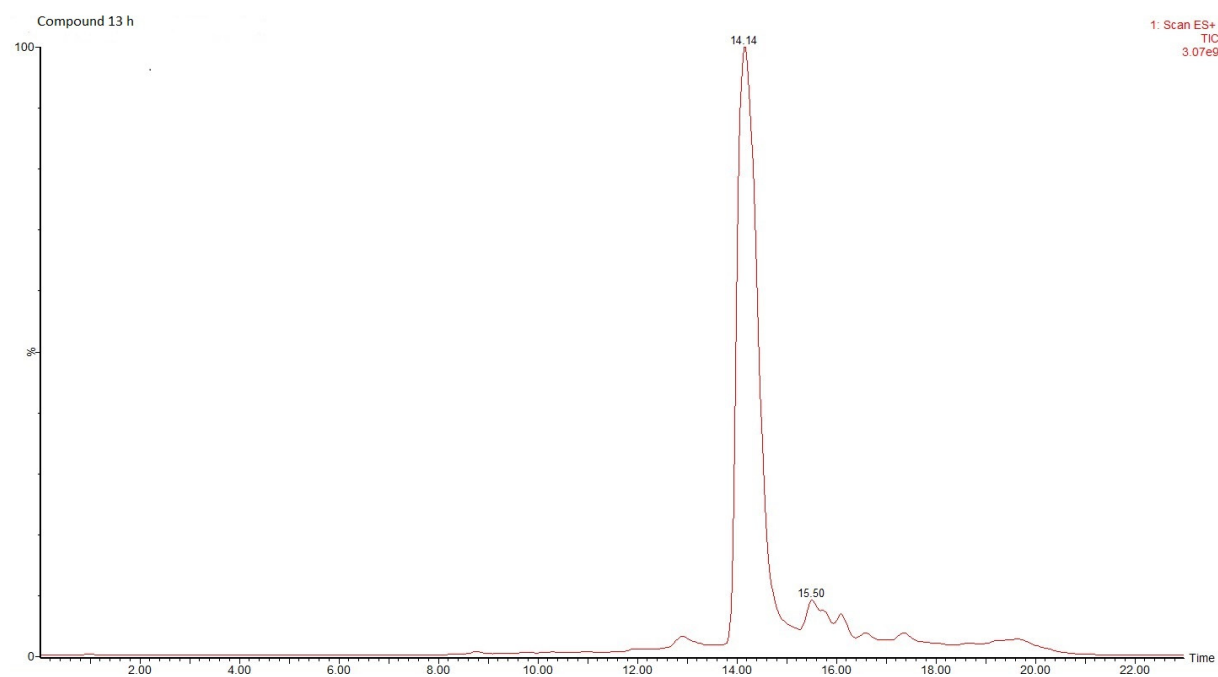

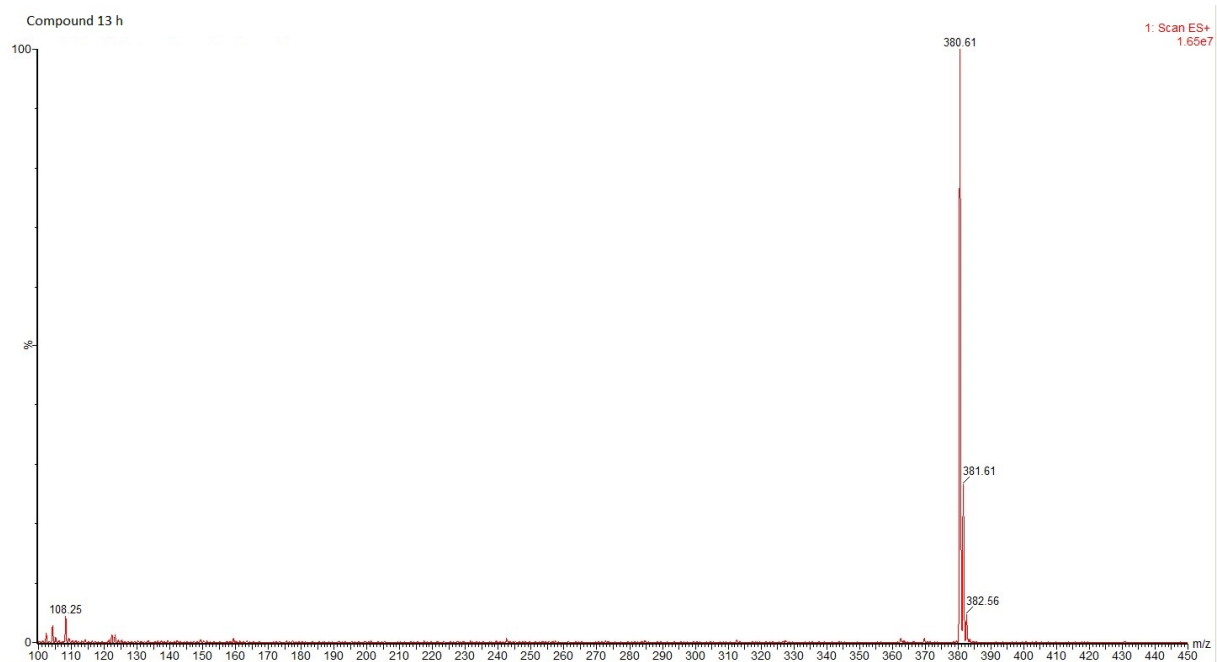

Supplement: s1 [file s1]
